# Supplementary material for: Isolation, molecular detection and antimicrobial susceptibility profile of Salmonella from raw cow milk collected from dairy farms and households in southern Ethiopia
Source: PubMed Central journal article supplement (PMC8969351; doi:10.1186/s12866-022-02504-2), 2022-03-31
Supplement: 12866_2022_2504_MOESM1_ESM.pdf [file 12866_2022_2504_MOESM1_ESM.pdf]

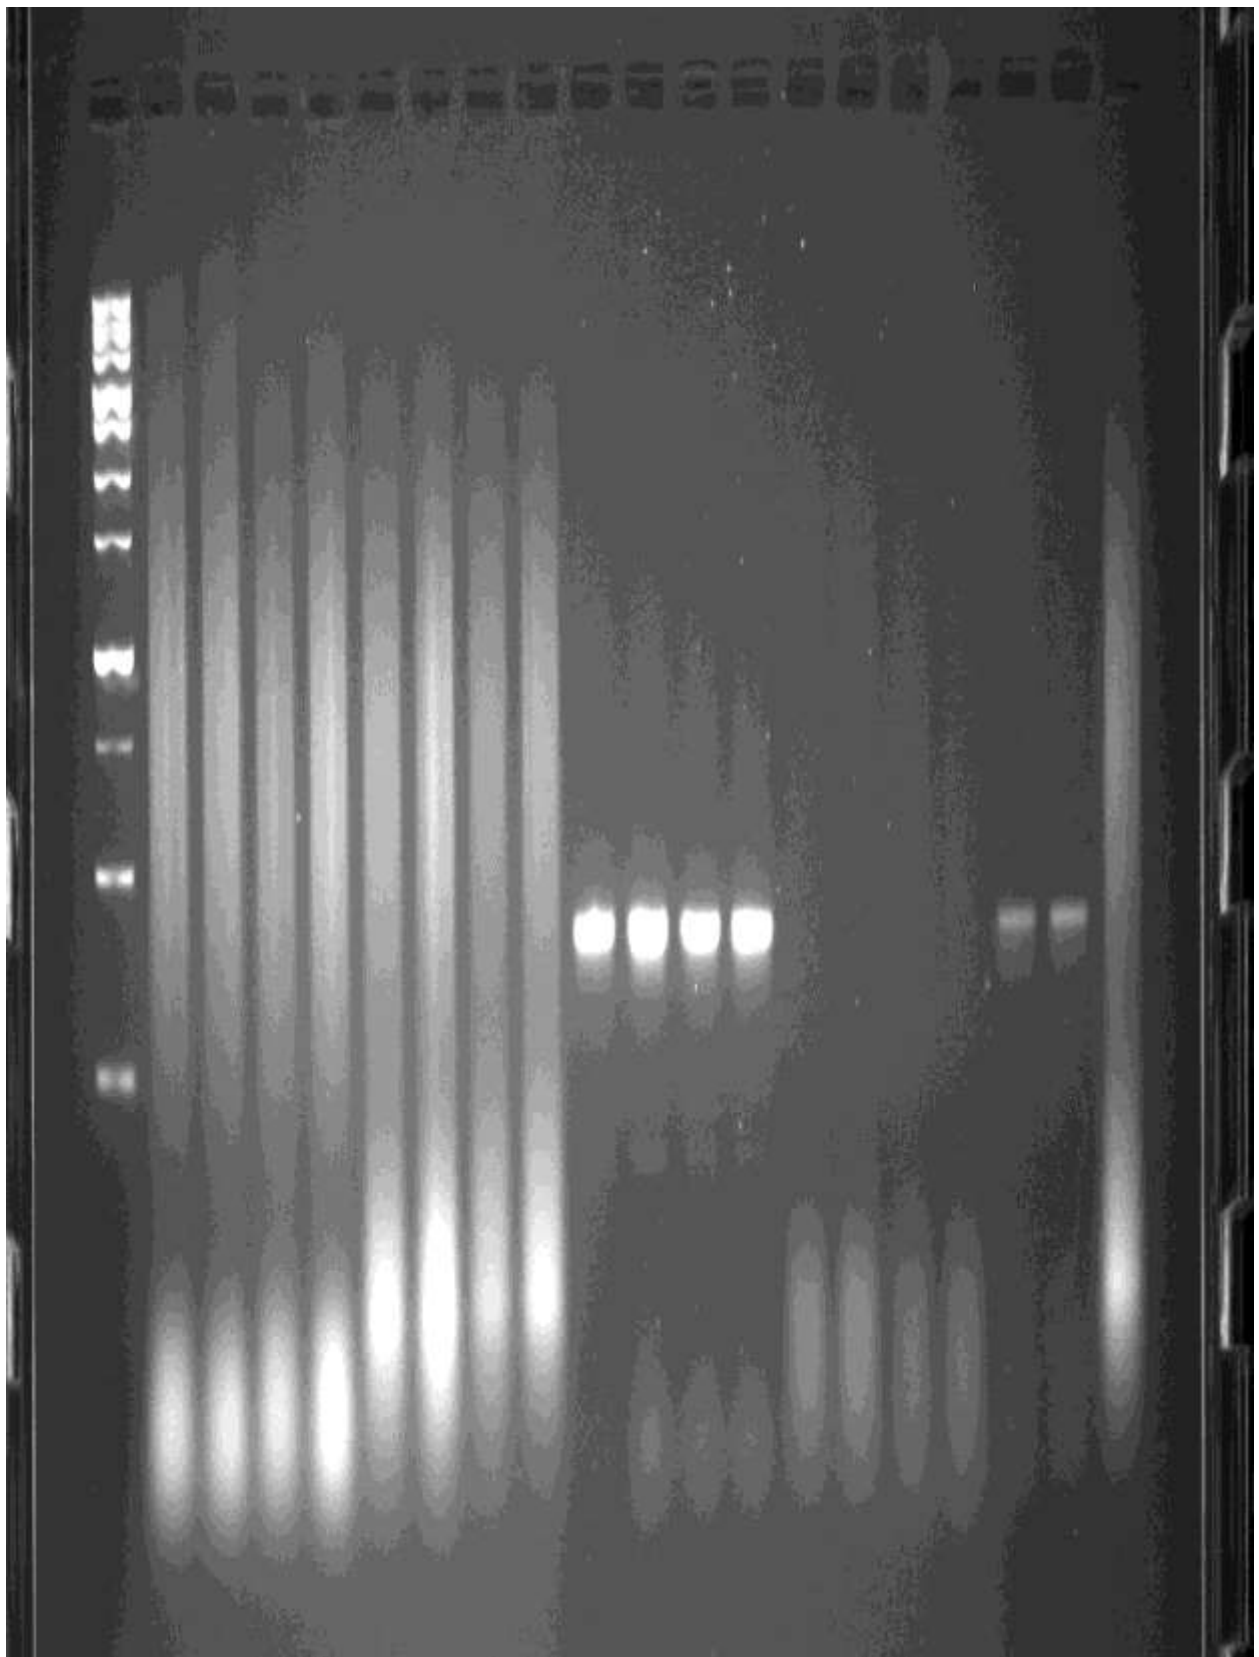

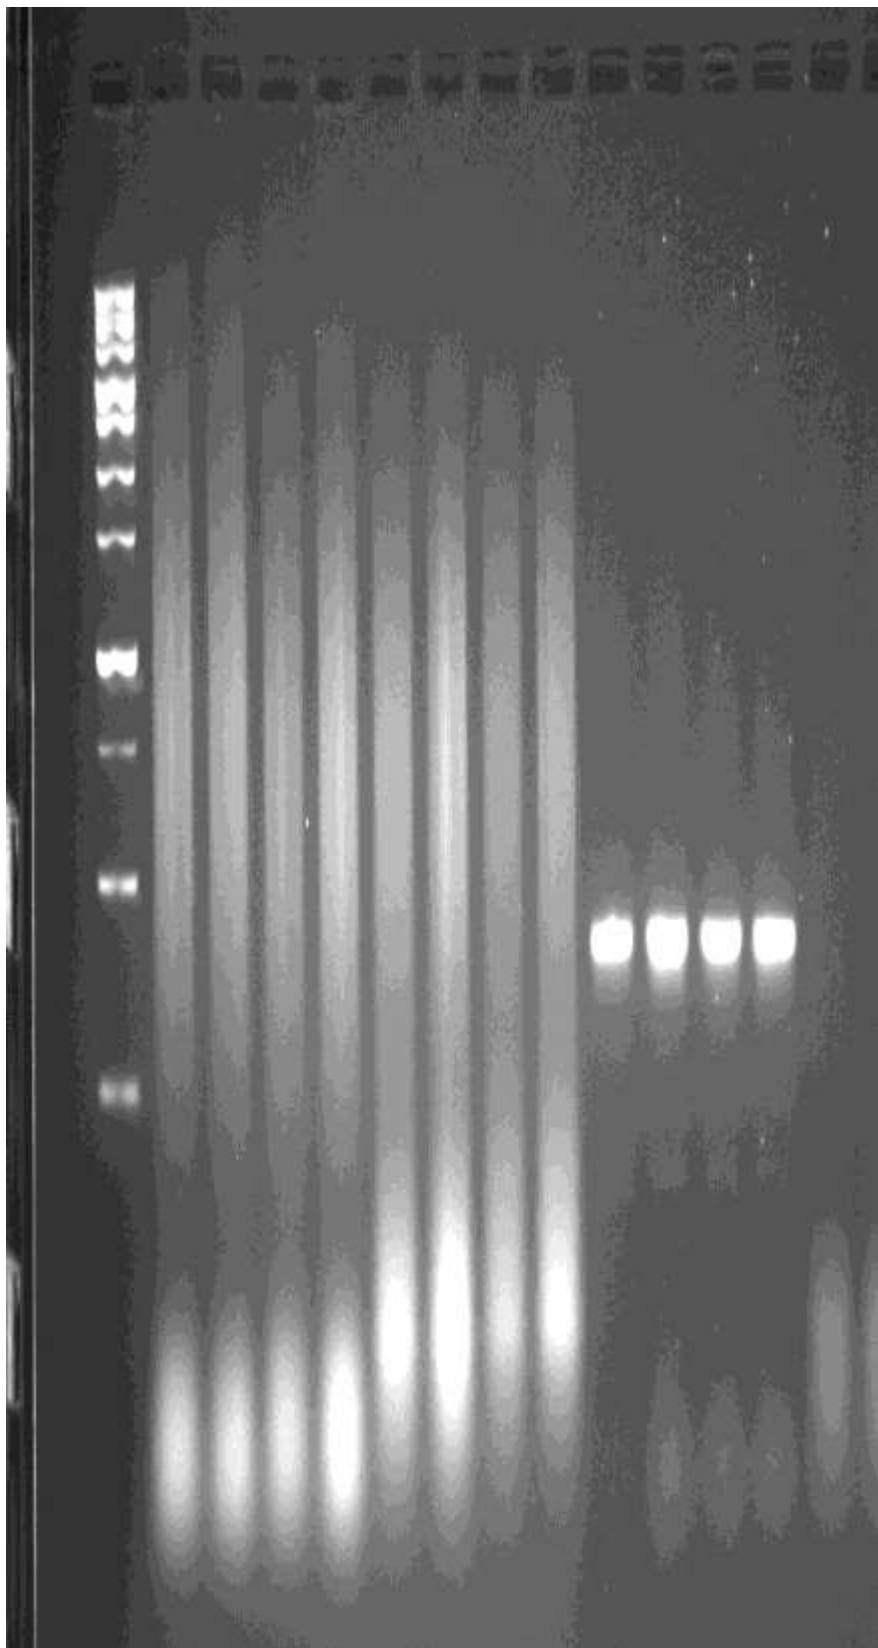

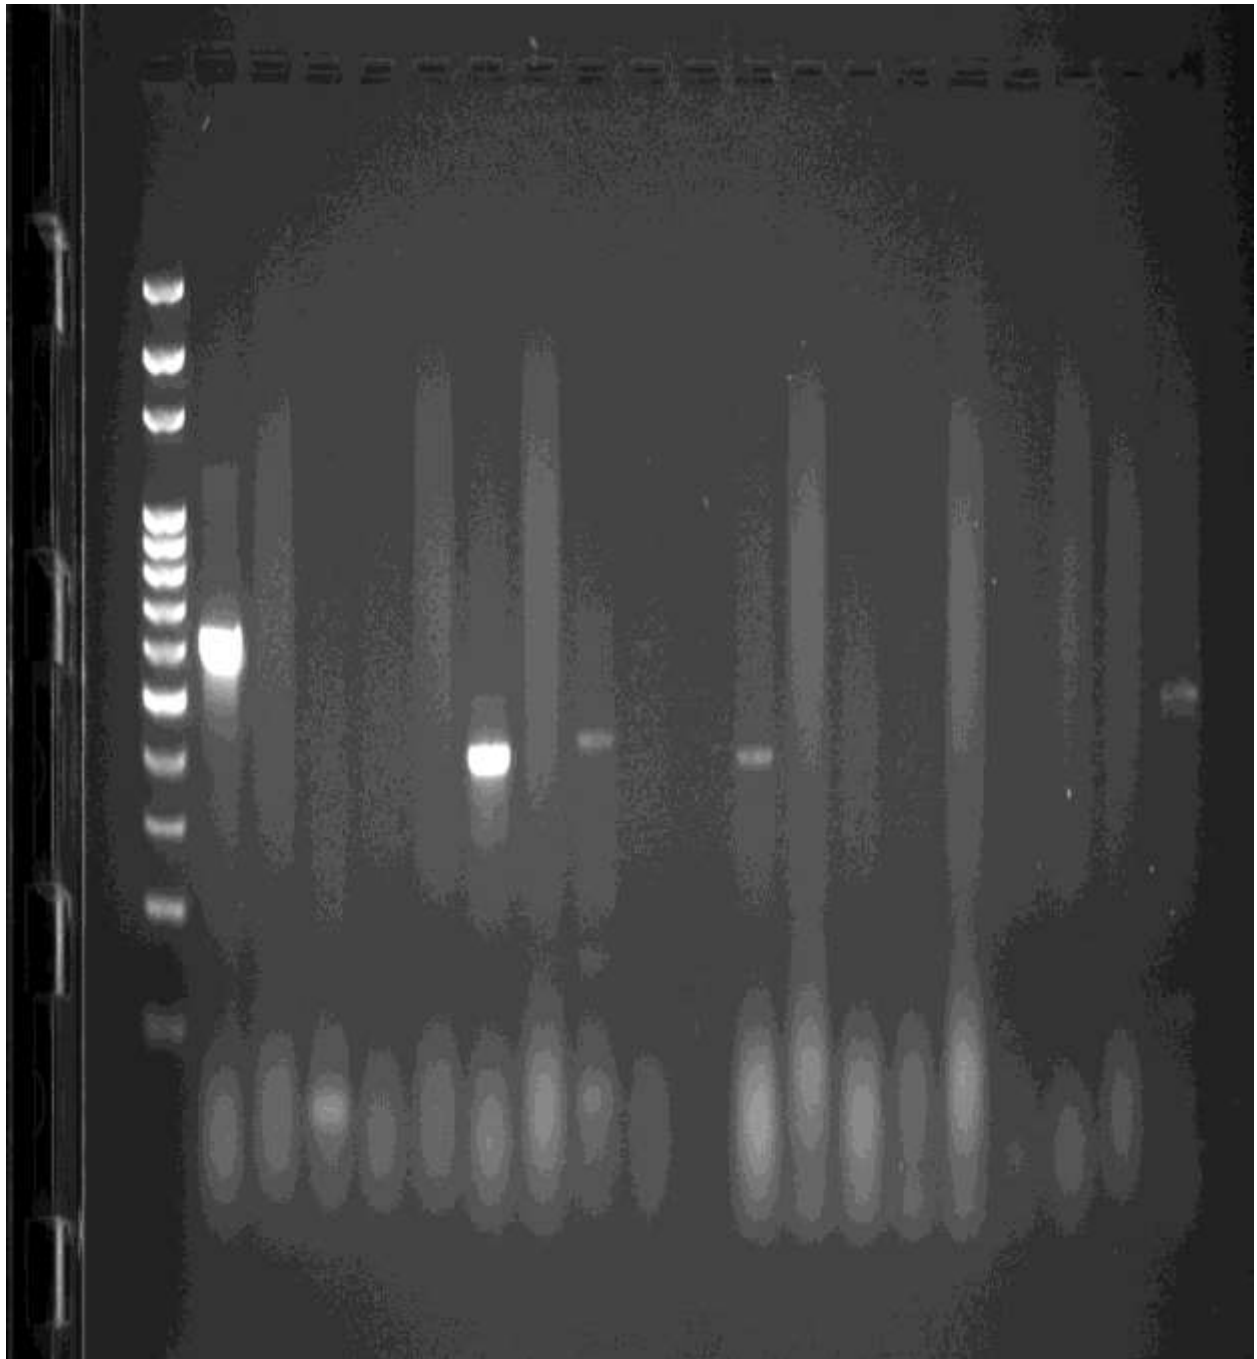

**Figure 1:** PCR amplification of biochemically identified *Salmonella*  
Keys to abbreviations: M= Marker (100 bp ladder); P= Positive control; N= Negative control and lane 1-36= *Salmonella* isolates.
